# Supplementary material for: Effect of modulating the extracellular matrix cross linkage by genipin on tumor cell resistance and survival in thioacetamide-induced hepatocellular carcinoma in rats
Source: PeerJ. 2025 Jul 9;13:e19680. doi: 10.7717/peerj.19680 (PMC12255243; doi:10.7717/peerj.19680)
Supplement: Supplemental Information 1 [file peerj-13-19680-s001.xlsx]

## Sheet: Size of tumors
Group	Rat number	Average number of nodules	Tumor diameter mm
			1	2	3	4	5	6	7	8	9	10	11	12	13	14	15	16
Control	1	0
Control	2	0
Control	3	1	1.2
Control	4	0
Control	5	0
Control	6	0
Control	7	1	0.7
Control	8	0
Control	9	1	1.1
Control	10	1	1.3
Control+Genipin	1	0
Control+Genipin	2	1	0.8
Control+Genipin	3	0
Control+Genipin	4	0
Control+Genipin	5	1	1.4
Control+Genipin	6	0
Control+Genipin	7	0
Control+Genipin	8	1	1.1
Control+Genipin	9	0
Control+Genipin	10	0
HCC	1	15	3.8	4.1	3.7	1.9	4.8	2.1	7.4	4.1	5.4	1.2	1.6	2.6	5.1	3.8	1.7
HCC	2	14	2.7	1.1	2.1	3.7	4.4	2.6	1.8	5.4	6.9	4.3	1.2	8.2	3.6	2.2
HCC	3	16	8.4	4.3	2.8	9.3	1.5	1.1	32	3.2	5.1	3.8	2.5	2.2	4.1	2.8	5.4	2.8
HCC	4	12	2.8	9.1	1.7	4.4	3.8	3	3.9	2.8	6.9	3.4	2.1	4.1
HCC	5	15	3.1	1.8	1.4	4.8	3.9	8.2	2	1.8	3.8	3.3	8.8	1.9	2.1	4.3	3.8
HCC	6	13	1.8	2.3	8.3	2	3.8	1.4	3.4	4	1.8	2.9	1.6	4.3	2.9
HCC	7	16	2	3.5	1.5	7.4	2.3	5.9	1.9	3	4.2	9.3	1.6	3.8	3.1	2.2	2.9	4.1
HCC	8	13	3.1	1.8	7.6	3.3	4	8.2	3.8	4.1	3.5	5	3.8	5.2	4.2
HCC	9	9	4.9	8.1	3.8	6.3	4.7	2.9	1.3	4.1	2.1
HCC	10	10	7.3	4.9	5.3	2.8	1.8	7.7	3.9	2.8	4.3	2.9
HCC+Genipin	1	2	3.8	7.1
HCC+Genipin	2	3	4.3	2.8	4.1
HCC+Genipin	3	6	3.8	6.9	1.4	3.2	4.1	2.9
HCC+Genipin	4	3	3.1	2.8	1.4
HCC+Genipin	5	5	5.7	1.7	3.1	2.2	3.2
HCC+Genipin	6	4	3.7	6.1	2.8	2.7
HCC+Genipin	7	2	1.9	2.7
HCC+Genipin	8	5	2.1	3.1	2.5	1.6	4.1
HCC+Genipin	9	3	2.1	1.6	2.9
HCC+Genipin	10	5	1.7	3.2	4.1	2.2	3.2

## Sheet: qPCR data
Group	Rat number	Relative gene expression of versican	Relative gene expression of EGF	Relative gene expression of EGFR	Relative gene expression of PKB	Relative gene expression of GSK-3β	Relative gene expression of fibronectin
Control	1	1.05	1.03	1.04	1.02	0.98	0.94
Control	2	1.1	0.94	1.09	1.07	1.05	0.96
Control	3	0.97	0.96	1.02	1.11	1.03	1.03
Control	4	0.9	0.99	0.91	0.93	0.93	1.08
Control	5	1.01	1.08	0.95	0.96	0.98	1.02
Control	6	1.03	1.11	1.05	1.04	0.99	1.05
Control	7	1.06	0.97	1.02	0.98	0.96	0.98
Control	8	0.94	0.93	0.97	0.97	1.02	0.97
Control	9	0.98	0.94	0.99	0.95	1.04	0.99
Control	10	0.96	1.05	0.96	0.97	1.02	0.98
Control+Genipin	1	0.97	0.96	1.01	0.94	1.05	1.06
Control+Genipin	2	0.94	0.93	0.92	0.99	1.03	1.11
Control+Genipin	3	1.12	0.96	0.89	0.93	1.01	0.96
Control+Genipin	4	0.99	1.02	0.94	1.02	0.93	1.09
Control+Genipin	5	1.07	1.07	0.97	1.07	0.95	1.05
Control+Genipin	6	1.15	0.94	0.98	0.97	0.97	0.97
Control+Genipin	7	0.98	0.88	1.07	1.11	0.95	1.07
Control+Genipin	8	1.01	0.97	1.04	1.05	0.88	0.96
Control+Genipin	9	1.09	0.92	0.96	1.03	0.91	0.99
Control+Genipin	10	1.08	0.95	0.92	1.09	0.92	1.04
HCC	1	4.31	3.82	3.87	3.24	3.53	3.46
HCC	2	5.24	4.04	3.21	2.81	3.14	3.65
HCC	3	3.96	3.72	3.25	2.96	4.32	3.77
HCC	4	4.12	3.39	3.28	2.22	4.11	4.14
HCC	5	4.32	3.48	3.13	2.78	4.25	4.44
HCC	6	4.11	3.12	3.82	3.42	3.67	3.98
HCC	7	4.81	3.29	4.12	2.67	3.77	3.95
HCC	8	5.03	3.88	3.88	2.11	3.43	4.32
HCC	9	4.03	3.74	2.76	2.42	4.19	3.41
HCC	10	3.87	3.92	2.88	2.27	4.29	3.28
HCC+Genipin	1	1.63	1.38	1.72	1.59	1.64	1.73
HCC+Genipin	2	1.59	1.44	1.34	1.71	1.71	1.91
HCC+Genipin	3	1.38	1.52	1.43	1.48	1.48	1.59
HCC+Genipin	4	1.43	1.69	1.48	1.44	1.34	1.54
HCC+Genipin	5	1.49	1.29	1.64	1.65	1.42	1.54
HCC+Genipin	6	1.44	1.48	1.28	1.51	1.52	1.47
HCC+Genipin	7	1.38	1.63	1.37	1.58	1.62	1.83
HCC+Genipin	8	1.59	1.37	1.64	1.44	1.67	1.69
HCC+Genipin	9	1.5	1.32	1.79	1.38	1.34	1.77
HCC+Genipin	10	1.47	1.28	1.71	1.52	1.36	1.83

## Sheet: ELISA data
Group	Rat number	Serum alpha fetoprotein (ng/ml)	Hepatic versican concentration (ng/ml)	Hepatic EGF concentration (ng/ml)	Hepatic EGFR concentration (ng/ml)	Hepatic PKB concentration (ng/ml)	Hepatic GSK-3β concentration (ng/ml)	Hepatic fibronectin concentration (ng/ml)
Control	1	1.24	7.12	9.46	12.92	1.83	1.35	16.74
Control	2	1.73	6.76	8.35	12.72	1.68	1.63	18.34
Control	3	1.13	6.11	8.54	10.25	3.24	1.64	18.61
Control	4	1.32	6.55	8.11	11.43	3.18	1.51	17.55
Control	5	1.43	5.89	8.53	11.83	2.54	1.47	16.12
Control	6	1.56	5.54	9.29	9.47	1.49	1.43	17.91
Control	7	1.71	6.45	9.11	10.91	1.71	1.38	14.95
Control	8	1.63	6.12	9.01	13.27	3.43	1.54	15.43
Control	9	1.57	5.92	9.64	9.69	2.11	1.42	16.11
Control	10	1.38	5.74	9.06	13.71	1.89	1.33	16.34
Control+Genipin	1	1.43	6.74	9.39	11.29	1.44	1.54	18.34
Control+Genipin	2	1.37	6.48	8.96	9.39	1.94	1.66	16.77
Control+Genipin	3	1.29	6.03	9.65	12.82	1.78	1.38	16.11
Control+Genipin	4	1.51	5.88	9.82	9.22	2.24	1.49	16.71
Control+Genipin	5	1.38	6.23	9.02	12.19	2.51	1.51	17.76
Control+Genipin	6	1.62	6.17	8.81	12.82	2.19	1.49	17.84
Control+Genipin	7	1.75	6.68	8.59	12.51	2.91	1.55	16.92
Control+Genipin	8	1.32	6.83	8.94	9.48	1.97	1.37	18.41
Control+Genipin	9	1.17	6.38	9.33	11.92	2.77	1.48	19.33
Control+Genipin	10	1.37	6.02	9.26	12.24	2.66	1.52	18.31
HCC	1	11.31	27.52	26.71	40.18	6.84	5.73	60.34
HCC	2	10.28	22.73	24.49	39.62	9.12	6.39	57.16
HCC	3	8.43	25.28	28.11	47.11	8.02	5.94	57.34
HCC	4	9.92	21.94	27.82	44.38	7.78	7.28	56.92
HCC	5	12.82	24.39	26.48	46.71	7.11	6.13	55.03
HCC	6	7.42	24.97	27.91	42.34	6.46	6.77	61.49
HCC	7	10.54	26.54	28.37	48.18	6.91	5.98	53.65
HCC	8	12.81	22.77	28.67	49.12	6.24	6.09	53.41
HCC	9	9.11	26.91	28.96	43.23	6.78	6.35	53.71
HCC	10	8.19	27.02	26.91	45.34	6.12	5.23	55.77
HCC+Genipin	1	3.91	12.12	12.84	17.42	4.11	2.74	22.45
HCC+Genipin	2	2.81	11.29	15.05	16.82	3.25	2.71	21.74
HCC+Genipin	3	2.82	12.83	14.77	19.59	3.89	2.53	23.41
HCC+Genipin	4	1.91	10.62	15.24	19.19	3.73	2.41	25.51
HCC+Genipin	5	1.81	13.04	14.97	22.34	3.31	2.54	23.72
HCC+Genipin	6	2.51	8.93	14.09	24.31	3.67	2.35	26.44
HCC+Genipin	7	3.73	9.69	13.02	22.91	4.23	2.49	27.54
HCC+Genipin	8	3.13	10.19	14.71	21.77	3.98	2.71	27.11
HCC+Genipin	9	2.11	9.11	12.38	19.24	3.51	2.16	26.83
HCC+Genipin	10	2.18	8.54	13.71	19.76	3.98	2.21	22.36
