# Supplementary material for: Effect of modulating the extracellular matrix cross linkage by genipin on tumor cell resistance and survival in thioacetamide-induced hepatocellular carcinoma in rats
Source: PeerJ. 2025 Jul 9;13:e19680. doi: 10.7717/peerj.19680 (PMC12255243; doi:10.7717/peerj.19680)
Supplement: Supplemental Information 3 [file peerj-13-19680-s003.xls]

## Sheet: Sheet1
ITEM TO CHECK	IMPORTANCE	CHECKLIST
EXPERIMENTAL DESIGN
Definition of experimental and control groups	E	Page 3 Line 109
Number within each group	E	Page 3 Line 118
Assay carried out by core lab or investigator's lab?	D	Page 5 Line 177
Acknowledgement of authors' contributions	D	In the system
SAMPLE
Description	E
Volume/mass of sample processed	D	Page 4 Line 137
Microdissection or macrodissection	E	Page 4 Line 139
Processing procedure	E
If frozen - how and how quickly?	E	Page 4 Line 144
If fixed - with what, how quickly?	E	Page 4 Line 142
Sample storage conditions and duration (especially for FFPE samples)	E	Page 4 Line 144
NUCLEIC ACID EXTRACTION
Procedure and/or instrumentation	E	Page 5 Line 179
Name of kit and details of any modifications	E	Page 5 Line 176
Source of additional reagents used	D	Page 5 Line 176
Details of DNase or RNAse treatment	E	Page 5 Line 181
Contamination assessment (DNA or RNA)	E	Page 5 Line 179
Nucleic acid quantification	E
Instrument and method	E	Page 5 Line 179
Purity (A260/A280)	D	Page 5 Line 180
Yield	D	Page 5 Line 185
RNA integrity method/instrument	E
RIN/RQI or Cq of 3' and 5' transcripts	E	Page 5 Line 185
Electrophoresis traces	D	Page 5 Line 181
Inhibition testing (Cq dilutions, spike or other)	E
REVERSE TRANSCRIPTION
Complete reaction conditions	E
Amount of RNA and reaction volume	E	Page 5 Line 181
Priming oligonucleotide (if using GSP) and concentration	E
Reverse transcriptase and concentration	E	Page 5 Line 182
Temperature and time	E	Page 5 Line 185
Manufacturer of reagents and catalogue numbers	D	Page 5 Line 182
Cqs with and without RT	D*
Storage conditions of cDNA	D
qPCR TARGET INFORMATION
If multiplex, efficiency and LOD of each assay.	E	Page 6 Table 1
Sequence accession number	E
Location of amplicon	D
Amplicon length	E
In silico specificity screen (BLAST, etc)	E
Pseudogenes, retropseudogenes or other homologs?	D
Sequence alignment	D
Secondary structure analysis of amplicon	D
Location of each primer by exon or intron (if applicable)	E
What splice variants are targeted?	E
qPCR OLIGONUCLEOTIDES
Primer sequences	E	Page 6 Table 1
RTPrimerDB Identification Number	D
Probe sequences	D**
Location and identity of any modifications	E
Manufacturer of oligonucleotides	D
Purification method	D
qPCR PROTOCOL
Complete reaction conditions	E	Page 5 Line 175
Reaction volume and amount of cDNA/DNA	E
Primer, (probe), Mg++ and dNTP concentrations	E
Polymerase identity and concentration	E
Buffer/kit identity and manufacturer	E
Exact chemical constitution of the buffer	D
Additives (SYBR Green I, DMSO, etc.)	E
Manufacturer of plates/tubes and catalog number	D
Complete thermocycling parameters	E
Reaction setup (manual/robotic)	D
Manufacturer of qPCR instrument	E
qPCR VALIDATION
Evidence of optimisation (from gradients)	D
Specificity (gel, sequence, melt, or digest)	E
For SYBR Green I, Cq of the NTC	E
Standard curves with slope and y-intercept	E
PCR efficiency calculated from slope	E	Page 5 Line 190
Confidence interval for PCR efficiency or standard error	D
r2 of standard curve	E
Linear dynamic range	E	Page 5 Line 190
Cq variation at lower limit	E
Confidence intervals throughout range	D
Evidence for limit of detection	E
If multiplex, efficiency and LOD of each assay.	E
DATA ANALYSIS
qPCR analysis program (source, version)	E
Cq method determination	E
Outlier identification and disposition	E
Results of NTCs	E
Justification of number and choice of reference genes	E
Description of normalisation method	E
Number and concordance of biological replicates	D
Number and stage (RT or qPCR) of technical replicates	E
Repeatability (intra-assay variation)	E
Reproducibility (inter-assay variation, %CV)	D
Power analysis	D	Page 5 Line 190
Statistical methods for result significance	E
Software (source, version)	E
Cq or raw data submission using RDML	D
Table 1. MIQE checklist for authors, reviewers and editors. All essential information (E) must be submitted with the manuscript. Desirable
information (D) should be submitted if available. If using primers obtained from RTPrimerDB, information on qPCR target, oligonucleotides,
protocols and validation is available from that source.
*: Assessing the absence of DNA using a no RT assay is essential when first extracting RNA. Once the sample has been validated as
RDNA-free, inclusion of a no-RT control is desirable, but no longer essential.
**: Disclosure of the probe sequence is highly desirable and strongly encouraged. However, since not all commercial pre-designed assay
vendors provide this information, it cannot be an essential requirement. Use of such assays is advised against.
